# Supplementary material
Source: PubMed Central journal article supplement (PMC6294951)
Supplement: pnas.1800478115.sapp.pdf [file pnas.1800478115.sapp.pdf]

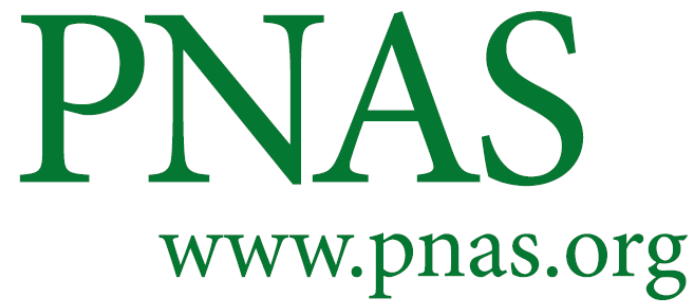

## Supplementary Information for

### **The Changing Demographics of Scientific Careers: The Rise of the Temporary Workforce**

Staša Milojević (Indiana University), Filippo Radicchi (Indiana University), John P. Walsh (Georgia Institute of Technology)

Staša Milojević  
Email: [smilojev@indiana.edu](mailto:smilojev@indiana.edu)

#### **This PDF file includes:**

Supplementary text

## **Supplementary Information Text**

The following are the lists of the principal, or core journals that were used in the analysis:

Astronomy (six journals): *Astronomical Journal*, *Astronomy & Astrophysics*, *Astrophysical Journal*, and *Monthly Notices of the Royal Astronomical Society*, *Astrophysical Journal Letters*, and *Astrophysical Journal Supplement Series*.

Ecology (nine journals): *Ecology*, *Journal of Animal Ecology*, *Journal of Ecology*, *Ecological Applications*, *Ecological Monographs*, *Journal of Applied Ecology*, *Ecography*, *Oecologia*, and *Oikos*.

Robotics (twelve journals): *Advanced Robotics*, *Autonomous Robots*, *IEEE Robotics & Automation Magazine*, *IEEE Transactions on Robotics*, *IEEE Journal of Robotics and Automation*, *IEEE Transactions on Robotics and Automation*, *Industrial Robot-An International Journal*, *International Journal of Robotics Research*, *Journal of Field Robotics*, *Journal of Robotic Systems*, *Journal of Intelligent & Robotic Systems*, and *Robotics and Autonomous Systems*.

There are 211,492 articles in these journals in the astronomy dataset, 53,264 in ecology and 13,603 in robotics (without publication year restriction).
